# Supplementary material for: The RNA-binding protein Squid is required for the establishment of anteroposterior polarity in the Drosophila oocyte
Source: Oxford University Press journal article supplement (doi:10.1242/dev.02159), 2005-11-16
Supplement: dev02159table1.pdf [file dev02159table1.pdf]

**Table S1. A constitutively active PKA transgene (*actp>mC\**) fails to rescue embryonic and larval lethality of *PKA* mutants efficiently**

A

| Germline genotype                                     | Eggs ( <i>n</i> )    | Eggs/<br>female/day | % Hatched larvae surviving to at least |                   |               |     |       |     |        |     |                 |
|-------------------------------------------------------|----------------------|---------------------|----------------------------------------|-------------------|---------------|-----|-------|-----|--------|-----|-----------------|
|                                                       |                      |                     | % Hatching                             |                   | Second instar |     | Pupae |     | Adults |     | Paternal rescue |
|                                                       |                      |                     | -                                      | +                 | -             | +   | -     | +   | -      | +   |                 |
| +/+                                                   | 934<br>928           | 2.7                 | 63                                     | 63                | >90           | >90 | >90   | >90 | >90    | >90 |                 |
| <i>DC0<sup>H2</sup>/DC0<sup>H2</sup></i>              | 438<br>566           | 0.8                 | 0                                      | 0                 |               |     |       |     |        |     |                 |
| <i>DC0<sup>H2</sup>/DC0<sup>H2</sup>, actp&gt;mC*</i> | 2838<br>3033<br>3590 | 0.8                 | 1.1<br>1.7<br>0.6                      | 1.6<br>3.3<br>1.2 | 39            | 83  | 0     | 55  | 0      | 55  |                 |

B

| Zygotic genotype                               | <i>n</i> | % Hatched larvae surviving to at least |              |       |        |
|------------------------------------------------|----------|----------------------------------------|--------------|-------|--------|
|                                                |          | Second instar                          | Third instar | Pupae | Adults |
| <i>DC0<sup>H2</sup>/Df(2L)γ15</i>              | 200      | 0                                      | 0            | 0     | 0      |
| <i>DC0<sup>H2</sup>/Df(2L)γ15, actp&gt;mC*</i> | 279      | 12                                     | 0            | 0     | 0      |
| <i>DC0<sup>H2</sup>/+, actp&gt;mC*</i>         | 266      | 43                                     | 21           | 11    | 3      |
| <i>actp&gt;mC*/+</i>                           | 130      | 49                                     | 30           | 17    | 10     |
